# Osteoporotic vertebral fractures: current concepts of conservative care

**Umile Giuseppe Longo<sup>†</sup>, Mattia Loppini<sup>†</sup>, Luca Denaro<sup>‡</sup>, Nicola Maffulli<sup>§\*</sup>, and Vincenzo Denaro<sup>†</sup>**

<sup>†</sup>Department of Orthopaedic and Trauma Surgery, Campus Biomedico University, Via Alvaro del Portillo, 200, 00128 Trigatoria Rome, Italy; <sup>‡</sup>Department of Neuroscience, University of Padua, Via Giustiniani 5, 35128 Padua, Italy, and <sup>§</sup>Centre for Sports and Exercise Medicine, Barts and The London School of Medicine and Dentistry Mile End Hospital, 275 Bancroft Road, London E1 4DG, UK

**Introduction:** Osteoporotic vertebral compression fractures (VCFs) are a growing public health problem with important socio-economic effects in western countries. In the USA, 10 million people over 50 suffer from osteoporosis. In these patients, 1.5 million annual fractures have been registered, and 50% of these are vertebral compression.

**Sources of data:** We performed a comprehensive search of PubMed, Medline, Cochrane, CINAHL and Embase databases using various combinations of the keywords 'osteoporosis', 'vertebral compression fractures', 'brace', 'bracing', 'orthosis', 'conservative management' and 'rehabilitation' over the years 1966–2011. All articles relevant to the subject were retrieved, and their bibliographies were hand searched for further references in the context of conservative management of osteoporotic vertebral fractures.

**Areas of agreement:** Conservative management for patients with osteoporotic vertebral fractures includes bed rest, pain medication, physiotherapy and bracing.

**Areas of controversy:** A conservative management for patients with osteoporotic VCFs has not been standardized. The utility of vertebral augmentation techniques has been questioned by recent randomized controlled trials.

**Growing points:** Randomized controlled trials are being performed worldwide on vertebral augmentation techniques.

**Areas timely for developing research:** Although spinal orthoses are commonly used for the management of patients with osteoporotic vertebral fractures, in the literature there is only one randomized controlled trial on bracing for this condition. While the best conservative management for subjects with osteoporotic VCFs is not defined and standardized, no conclusions on the superiority of vertebral augmentation techniques over conservative management can be drawn.

\*Correspondence address.  
Queen Mary University of  
London, Barts and The  
London School of  
Medicine and Dentistry,  
William Harvey Research  
Institute, Centre for  
Sports and Exercise  
Medicine, Mile End  
Hospital, 275 Bancroft  
Road, London E1 4DG,  
UK. E-mail: n.maffulli@  
qmul.ac.uk

*Keywords:* osteoporosis/vertebral compression fractures/brace/conservative management/vertebroplasty/kyphoplasty/rehabilitation

*Accepted:* September 29, 2011

## Introduction

In osteoporosis, low bone mass and microarchitectural deterioration of bone tissue lead to bone fragility and increased risk of fracture.<sup>1</sup> In the USA, 10 million people over 50 suffer from osteoporosis, while an additional 34 million people are at significant risk to develop the disorder. In the affected group, 1.5 million annual fractures have been registered and 50% of these are vertebral compression fractures (VCFs), twice the rate of hip fractures.<sup>1</sup>

Recent data from the European Vertebral Osteoporosis Study have shown that the overall prevalence of vertebral deformity in women is higher than in men, and it also increases with ageing (from 5% at 50 years to 25% at 75 years in women; from 10 to 18% in men).<sup>2</sup>

Osteoporosis usually remains silent and back pain arising from painful VCF could be the first symptom that patients report. However, just one-third of the patients with osteoporotic VCFs are symptomatic.<sup>3</sup> When a painful VCF occurs, symptoms should be treated and predictable complications should be avoided.<sup>4</sup> Both acute (i.e. spinal cord compression) and chronic complications (i.e. progressive kyphosis) have been described. Postural changes associated with kyphosis may limit activity, including bending and reaching. Moreover, restrictive lung disease may arise when multiple thoracic fractures occur.<sup>5-7</sup>

Because of increasing population's age and severe morbidity, VCFs represent a growing serious public health problem with important socio-economic effects in western countries. In the 1990s, in the USA, direct medical costs from VCFs were >\$746 millions.<sup>8</sup> In the UK, the annual acute costs for the management of patients with VCFs has been estimated at around £12 millions.<sup>9</sup> The economic costs could be higher than reported, as it is often difficult to evaluate the associated long-term morbidities.

Vertebroplasty and kyphoplasty are two percutaneous minimally invasive vertebral augmentation methods for cement application into the vertebral body to manage symptomatic VCFs without neurological impairment.<sup>10,11</sup>

Vertebroplasty for the management of a painful aggressive haemangioma of a vertebral body was first reported in 1987.<sup>12</sup> Polymethylmethacrylate (PMMA) cement is injected percutaneously into a collapsed vertebral body under imaging guidance to strengthen it.

Kyphoplasty was introduced to manage the kyphotic deformity and help to realign the spine.<sup>13</sup> Kyphoplasty involves percutaneously inserting an inflatable bone tamp into a vertebral body. The inflation of the bone tamp with fluid allows restoration of vertebral height and correction of kyphosis. After deflation, the cavity which has been produced is filled by injection of PMMA.

The major problem when trying to perform a meta-analysis on the available studies for the use of vertebral augmentation in patients with VCF is that all the randomized controlled studies used different conservative modalities.

The conservative modalities used in these trials included bed rest, pain medication, physiotherapy and bracing.<sup>14</sup> However, several studies did not specify the length of the period of bed rest, bracing and the type of brace used.<sup>10,15</sup> This introduces biases in all the publications in which either vertebroplasty or kyphoplasty was compared with a conservative management modality. In fact, to compare a vertebral augmentation technique to a conservative management modality with or without brace and bed rest makes dramatic difference to the patient in term of satisfaction, pain and ability to return to their daily life activities.

Farrokhi *et al.*<sup>16</sup> performed a randomized controlled trial to compare percutaneous vertebroplasty versus optimal medical management for the relief of pain and disability in acute osteoporotic VCFs. In the control group, all patients were managed with acetaminophen with codeine twice daily, ibuprofen twice a day, calcium daily, vitamin D daily, alendronate orally once weekly and calcitonin daily. No braces or bed rest were prescribed.

Braces are used in patients with vertebral fractures to reduce pain by decreasing postural flexion that causes increased load on the painful fractured vertebra and by helping in relieving paraspinal muscle spasm.<sup>4</sup> Braces can help to reduce motion of the fractured vertebra, facilitating bone healing.<sup>4</sup> Traditionally, three-point contact braces facilitate thoracic and lumbar neutral positioning while decreasing flexion.<sup>4</sup> Guidelines on the management of symptomatic osteoporotic spinal compression fractures have been recently published by the American Academy of Orthopaedic Surgeons. The authors were unable to recommend for or against treatment with a brace for patients with an osteoporotic spinal compression fracture on imaging, correlating with clinical signs and symptoms and who are neurologically intact.

Unfortunately, until a safe and effective conservative management will not be standardized, all the studies on the topic will have enormous limitations.

In this systematic review of the literature, we aimed to report the best evidence-based conservative management options for patients with osteoporotic VCF.

## Methods

We performed a comprehensive search of PubMed, Medline, Cochrane, CINAHL and Embase databases using various combinations of the keywords ‘osteoporosis’, ‘vertebral compression fractures’, ‘brace’, ‘bracing’, ‘orthosis’, ‘conservative management’ and ‘rehabilitation’ over the years 1966–2011. All articles relevant to the subject were retrieved, and their bibliographies were hand searched for further references in the context of conservative management of osteoporotic vertebral fractures. We considered publications in any language. Reviewers scanned the bibliographies of all retrieved studies and other relevant publications, including reviews and meta-analyses, for additional relevant articles.<sup>14,17–43</sup> Two reviewers (U.G.L. and M.L.) screened the titles and abstracts of identified citations independently and in duplicate and acquired the full text of any article that either judged potentially eligible. These reviewers independently applied eligibility criteria to the methods section of potentially eligible trials. Only articles published in peer-reviewed journals were included in this systematic review. We resolved disagreements by discussion.

Three reviewers (U.G.L., M.L. and L.D.) extracted data from each eligible study independently and in triplicate. Data included personal information, methodology, details on interventions and reported outcomes. We excluded studies on outcome of vertebral augmentation for the purpose of this study.

## Risk factor

Although osteoporotic VCF have a multifactorial aetiology, bone mineral density (BMD) is a central component of any management plan. Osteoporosis is defined by the World Health Organization (WHO) in terms of BMD measured with dual energy X-ray absorptiometry.<sup>44</sup> Osteopenia consists of mild-to-moderate bone deficiency and a BMD value ranging from 1 and 2.5 standard deviations below average peak bone mass. Osteoporosis is a marked bone deficiency status, defined with BMD measurements  $>2.5$  standard deviations below average peak bone mass. Severe osteoporosis is defined as osteoporosis status associated with osteoporotic fragility fractures.<sup>45</sup>

Osteoporotic fragility fractures are defined as occurring at a site associated with low BMD; they have an increased incidence after the age of 50 years.<sup>46</sup>

Several risk factors have been associated with osteoporotic fragility fractures. However, few of them, including current age, family and personal history of fragility fractures, low body weight and a history of smoking, presents an evidence-based association with high risk of vertebral fracture, such as decreased BMD.

Evidence-based risk factors have been included in the WHO fracture risk model (Table 1). The included factors increase risk independently of BMD, and can be combined with BMD values to assess patient's risk of future fracture.

The BMD and risk for vertebral fracture are inversely related, with 2.3-fold increase in risk for each standard deviation decrease in spine BMD.<sup>47</sup> Age is another factor that contributes to risk independently of BMD. The risk of osteoporotic fracture increases significantly with age for both men and women. In addition, for each value of BMD, the fracture risk is much higher in elderly than in young people. In women, the risk of osteoporotic VCF increases 6-fold from menopause to age 85.<sup>48,49</sup> A previous VCF is an important risk factor for subsequent vertebral fracture. The relative risk to develop a new fracture in a female population with one pre-existing vertebral deformity is 5.4. Moreover, the risk is increased by a combination of low BMD and history of previous VCF, with a reported 25-fold higher risk.<sup>50</sup>

The identification of low values of BMD with any of the aforementioned risk factors provides a significantly greater risk of fragility fracture. Remarkably, patients with low risk of future fractures should be periodically reassessed, by reviewing risk factors for osteoporosis and measuring BMD, as the risk could increase over their remaining lifetime years.

**Table 1** WHO fracture risk assessment model: risk factors.

---

|                                                                               |
|-------------------------------------------------------------------------------|
| Current age                                                                   |
| Gender                                                                        |
| A prior osteoporotic fracture (including morphometric vertebral fracture)     |
| Parental history of hip fracture                                              |
| Femoral neck BMD                                                              |
| Low body mass index (kg/m <sup>2</sup> )                                      |
| Alcohol intake (3 or more drinks/day)                                         |
| Current smoking                                                               |
| Oral glucocorticoids $\geq 5$ mg/day of prednisone for $\geq 3$ months (ever) |
| Rheumatoid arthritis                                                          |
| Secondary osteoporosis                                                        |

---

## Classification

Several classification systems of vertebral fractures have been proposed. In 1991, Eastell *et al.*<sup>51</sup> suggested an easy classification system including three types of fracture, based on deformity shape of vertebrae: (i) vertebral fracture with ‘wedge deformity’, in which there was a decrease in the anterior height of vertebral body without any involvement of the posterior height; (ii) vertebral fracture with ‘biconcavity deformity’, in which there was a reduction in the middle height without involvement of the anterior and posterior wall of vertebral body; (iii) vertebral fracture with ‘compression deformity’, in which any part of the vertebral body has been involved with reduction in anterior, posterior and middle heights.

Recently, the two most commonly used classifications for VCF in clinical practice were described by Sugita *et al.*<sup>52</sup> and Wu *et al.*<sup>53</sup>

Sugita *et al.*<sup>52</sup> developed a classification system including five types of fracture identified on lateral radiographic views: (i) the ‘swelled front’, in which >50% of the anterior wall is convex anteriorly; (ii) the ‘bows haped’, in which the anterior wall is pinched inward and the upper endplate is collapsed; (iii) the ‘projecting’, in which <50% of the anterior wall is convex anteriorly; (iv) the ‘concave’, in which the upper endplate is collapsed without any fracture of the anterior wall and (v) the ‘dented’, in which the anterior wall is interrupted by fracture line (Fig. 1). This classification system allows to distinguish fractures with different prognosis. Both concave and dented types present a good prognosis with a short painful period and rapid healing. The remaining types present a poor prognosis because of significant bone loss, leading to high rates of collapse and vacuum cleft formation with subsequent slow healing.

Wu *et al.*<sup>53</sup> described a classification system, based on lateral radiographic views, consisting of two types of fracture: in a type I fracture, compression involves only the anterior column; in type II, the fracture involves both the anterior and middle columns. Each of them is subdivided into two groups: ‘non-union’ group, characterized by vacuum cleft within injured vertebra and kyphotic angle changes in standing dynamic radiographs and ‘union’ group, characterized by healed fracture.

## Diagnosis

The incidence of osteoporotic VCFs is difficult to estimate, because most patients are asymptomatic at the time of diagnosis and only

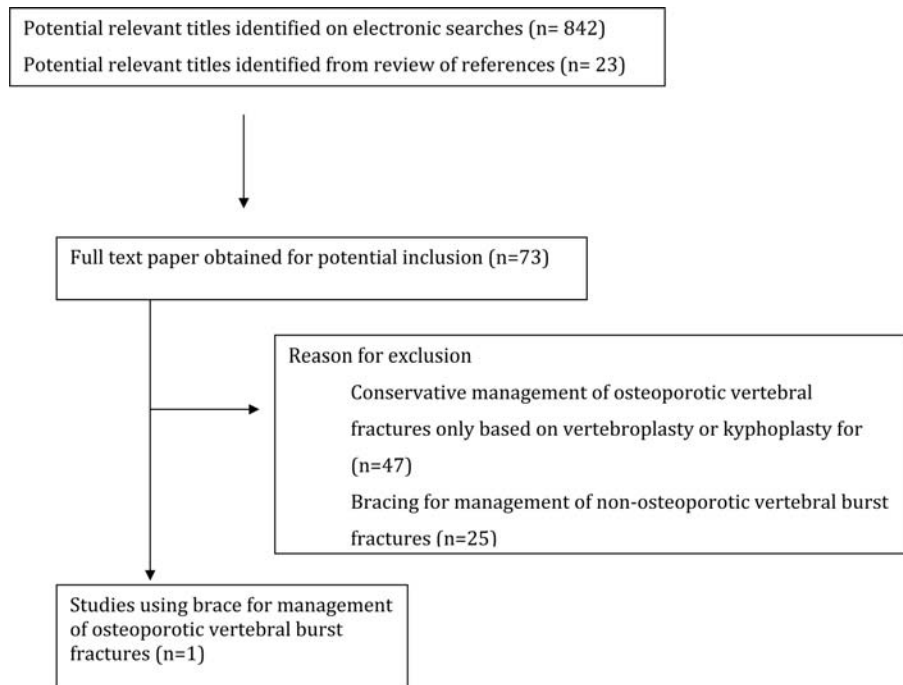

Fig. 1 Flow chart of the available studies on orthoses.

one-third of them complain of an acute painful event.<sup>54</sup> For this reason, osteoporotic VCF should be suspected in any old or osteoporotic patient who complains of new-onset back pain, even with no history of trauma. The onset of pain is usually related to atraumatic activities such as bending forward, standing from a seated position, coughing or sneezing.<sup>55</sup>

The first step of diagnosis includes history and physical examination. The latter, typically, does not reveal any specific finding. However, in patients with multiple osteoporotic VCF, postural changes (i.e. focal kyphosis and lumbar lordosis reduction) or evident loss of height may be present at clinical examination. On physical examination, it is also possible to diagnose compression of a nerve root caused by a retro-pulsed bony fragment or neural foraminal narrowing. Radicular pain is revealed by a positive straight leg raise test, even when strength and reflex testing are negative.

Anteroposterior and lateral radiographs of the lumbar or thoracic spine are the first investigation to be performed. Dynamic flexion and extension views can add useful information.

Static radiographs allow to identify the type of fracture, documenting the vertebral loss of body height. VCF is defined as a decrease in anterior, middle or posterior height of at least 20%, or a decrease of at least



4 mm compared with baseline height (estimated basing on vertebral body high of upper or lower vertebra).<sup>51</sup> When a fracture with less marked collapse occurs, magnetic resonance imaging (MRI) may be helpful to confirm the diagnosis.

Static radiographs are also important to evaluate the posterior vertebral line. If the posterior column is involved, retropulsion of body vertebral fragment may occur with potentially dramatic consequences. When retropulsion is suspected, MRI or CT scan is recommended to assess the posterior column integrity, intervertebral discs collapse and nerve roots.

Dynamic radiographs (flexion–extension views) allow to measure dynamic vertebral translation, defined as the change in relative position of vertebra from hyperflexion to hyperextension.<sup>56</sup> When a vertebral fracture occurs, dynamic radiographs changing posture from maximum flexion to maximum extension show vacuum clefts (as a gas-like area of radiolucency) into the collapsed vertebral body<sup>57</sup> and changing of kyphotic angle.<sup>53</sup> Detection of unstable vertebral fractures is important because they could be complicated by retropulsion of bony fragment with subsequent neurological impairment.

Bone scan or MRI is helpful to determine the age of a compression fracture, especially when history is negative for trauma or fall. However, bone scan may not show a fracture for up to 10 days after an acute injury.<sup>54</sup> MRI usually shows decreased signal on T1 sequences and marrow oedema on T2 fat-saturation sequences at the fracture site.

When a VCF has been diagnosed, it is important to discriminate between osteoporotic and tumour-associated fractures. To rule out the malignant nature of a fracture, MRI can be helpful because the presence of a soft-tissue mass or pedicle involvement is suggestive of tumour. Instead of gadolinium enhancement, multiple level involvement and posterior vertebral expansion are not useful specifics for tumour fractures or lesions.<sup>58</sup> Bone scan can also suggest malignant nature of fracture by showing multiple areas of increased radionuclide uptake due to metastatic lesions. In addition, positron emission tomography with fluorine-18 deoxyglucose (FDG-PET) has been proposed to differentiate osteoporotic from pathological vertebral fractures, because malignant and inflammatory processes are characterized by high FDG uptake, whereas it is absent or slightly increased in osteoporotic fractures.<sup>59</sup>

## Management of acute osteoporotic vertebral fractures

To date, the best management of acute painful vertebral fractures is unclear. Although a controversial topic, very few level I studies are available. The conservative care of a patient with an acute painful



vertebral fracture focuses on two issues. The first goal is pain relief and rehabilitation, traditionally with analgesics, bed rest, orthotic support such as brace or corset and gradual mobilization, depending on pain. The second goal consists of assessment and management of the underlying osteoporosis.

### *Pain medication*

The acute pain arising from a new vertebral fracture usually resolves over a period of 6–12 weeks.<sup>60</sup> During this time, analgesia should be prescribed to reduce pain and encourage mobilization. Analgesia should begin with acetaminophen or salicylates<sup>61</sup> and non-steroidal anti-inflammatory drugs (NSAIDs). Because traditional NSAIDs are related to the risk of gastrointestinal bleeding and renal insufficiency, agents such as COX2 inhibitors could be considered.<sup>62</sup> A recent meta-analysis of case-control and cohort studies assessed the impairment of bone healing, with subsequent risk of non-union and NSAID exposure: the risk of non-union with NSAID was not confirmed by the highest-quality studies assessed.<sup>63</sup> Opioids should be administered to patients failing to obtain adequate relief with the first-line medications and activity modification. Opioids such as oxycodone can be used in combination with acetaminophen. However, narcotics have significant side effects, including reduced gastrointestinal motility, urinary retention, reduced respiratory drive and cognitive deficits, with loss of balance, increase of falls and depression.<sup>64</sup>

In addition, muscle relaxants may be helpful in the management of painful paravertebral muscle spasms. Although their efficacy has been evaluated in non-specific acute back pain conditions, they could stop the cycle of pain and muscle spasms following the vertebral fracture.<sup>65</sup> Muscle relaxants are most beneficial in the first 1 or 2 weeks of treatment. Moreover, the treatment should not be prolonged because of their potential side effects, such as drowsiness, dizziness, abuse and dependence in some cases.<sup>66</sup>

Osteoporosis active medications have been also used to obtain pain relief in acute vertebral fractures. A recent systematic review and meta-analysis on the use of calcitonin agents for patients with pain from recent osteoporotic vertebral fractures identified five randomized double-blind placebo-controlled trials involving a total of 246 patients and supported the use of calcitonin as an effective analgesic for acute pain in both men and women with recent osteoporotic vertebral fractures.<sup>67</sup>

Farrokhi *et al.*<sup>16</sup> recently performed a randomized controlled trial to compare percutaneous vertebroplasty versus optimal medical

management for the relief of pain and disability in acute osteoporotic VCFs. In the control group, all patients were managed with acetaminophen with codeine twice daily, ibuprofen twice a day, calcium daily, vitamin D daily, alendronate orally once weekly and calcitonin daily. The authors found statistically significant improvements in the visual analogue scale and the quality-of-life scores maintained over 24 months, improved vertebral body height maintained over 36 months and fewer adjacent-level fractures compared with the conservative group.

The bisphosphonates have been also used in the management of back pain associated with acute vertebral fracture. Rovetta *et al.* compared the efficacy of intravenous disodium clodronate with paracetamol. They found higher pain relief rate at the end of treatment<sup>68</sup> and better physical conditions after discontinuation of treatment in patients receiving disodium clodronate.<sup>69</sup> In a randomized, double-blind, controlled clinical trial comparing intravenous pamidronate and placebo, a rapid and sustained pain relief in patients with acute painful osteoporotic vertebral fracture treated with bisphosphonate was found.<sup>70</sup>

Two recent meta-analyses showed a role of teriparatide for pain management in patients with osteoporotic VCFs. Patients randomized to teriparatide had a reduced risk of new or worsening back pain compared with placebo, hormone replacement therapy or alendronate during the clinical trial period<sup>71</sup> and during 30 months of post-treatment observation.<sup>72</sup>

## Bracing

Bracing can represent a landmark step in conservative care of selected patients affected by compression vertebral fractures. The primary goal of bracing osteoporosis-related vertebral fractures is to prevent pain from movement by stabilization of the spine obtained with any kind of brace.<sup>54</sup> Moreover, bracing reduces back fatigue and it provides an opportunity for early mobilization with reduction of the bed rest period after an acute VCF. Bracing is typically necessary during the initial 6–8 weeks after the fracture, until the acute pain resolves.<sup>73</sup>

To date, the application of bracing is still largely opinion based. Although several types of brace are commonly used in patients with VCFs, only one randomized prospective, placebo, controlled trial has been performed on this topic.<sup>74</sup>

An ideal brace should be light weight, easy to put on, ensure comfort for high patients' compliance and prevent respiratory impairment. The type of brace for each patient may be chosen according to the patient's

need for comfort and function, clinical status, type and level of fractures.

The thoracolumbar orthoses (TLOs) are usually prescribed for thoracic fractures. Although several TLOs are available, the Jewitt and cruciform anterior spinal hyperextension (CASH) orthoses have been most commonly used because of their hyperextension design.<sup>54</sup> The Jewett brace is a three-point pressure system with two anterior pads, which place pressure over the sternum and pubic symphysis, and one posterior pad to produce an opposing pressure in the mid-thoracic region. The CASH brace consists of two anterior pads (sternal and pubic pads), attached to a metal, cross-shaped bar, one posterior pad (to produce force opposed by anterior pads) and strap around the thoracolumbar region.

In our experience, the Cheneau brace represents a good hyperextension brace. It is a thermoplastic brace modelled on a hyper-corrected positive plaster mould of the patient. It is fabricated in polypropylene and has an anterior opening with velcro straps for fastening.

Another hyperextension back brace is the Taylor brace that consists of two posterior paraspinal bars attached inferiorly to a pelvic band, an interscapular band stabilizing paraspinal bars, axillary straps attached posteriorly to an interscapular band and an anterior corset connected to the paraspinal bars. The Knight-Taylor brace consists of a corset-type front with lateral and posterior bands and shoulder straps. The anterior corset is fastened to the lateral bars. The posterior portion of the brace includes a cross band below the inferior angle of the scapula and a pelvic band fitted at the sacrococcygeal junction.

When the brace extends to the sacral segments, it is called a thoracolumbarsacral orthosis (TLSOs) and consists of a custom-moulded plastic body jacket in polypropylene or plastic.

For lower lumbar fractures, a rigid lumbosacral orthosis (LSO) is frequently adequate. It is a custom-made orthosis moulded over the iliac crest. It consists of plastic anterior and posterior overlapped shells, with multiple holes for aeration, and a velcro strap frontally. Some authors propose for these fractures a standard lumbosacral corset.<sup>75</sup>

For patients with multiple fractures, custom-made braces may be useful, although they may be uncomfortable because they are hot to wear.<sup>76</sup>

The ideal spinal orthoses provide an adequate stabilization of the spine, reducing gross spinal motion, segmental motion at the injured segment and it may be able to provide sagittal plane hyperextension, if required. The effect of spinal orthoses on segmental and overall motion of the trunk and the effect on the myoelectric activity of trunk muscles have been assessed in several biomechanical studies.

Bracing allows to restrict gross spinal motion, based on the specific design of brace.<sup>77–79</sup> Although LSO braces reduce gross trunk range of motion on the sagittal plane,<sup>80,81</sup> their effect on intervertebral motion is related to the vertebral level considered: intervertebral motion is reduced at the upper segments (L1–L3) and increased at the lower levels (L4–S1).<sup>82,83</sup> Moreover, they restrict the axial rotation at the lumbosacral level, as observed in subjects wearing a chairback brace.<sup>84</sup> The rigidity of material used to fabricate the brace represents an important feature influencing the effectiveness of the orthosis. Cholewicki *et al.*<sup>85</sup> showed that a non-extensible LSOs (made of polyester and nylon) increased trunk stiffness and limited trunk motion, while the extensible LSOs (made of neoprene and lycra) did not have any such significant effects.

When hyperextension of the spine must be obtained, the Jewett brace is the standard, although recently the CASH brace has become an acceptable alternative.<sup>86</sup> However, although the Jewett and CASH braces provide excellent sagittal hyperextension-limiting flexion–extension motion, they are not able to reduce efficaciously motion on the coronal and transverse planes. The Knight-Taylor brace is effective in lateral bending, fair in flexion–extension, but it provides ineffective restriction of axial rotation.<sup>87</sup> Moreover, the Knight-Taylor spinal brace allows patients to maintain static and dynamic motor balance.<sup>88</sup>

In the non-operative management of severe compression fractures, an orthosis which provides sagittal three-point hyperextension and gross trunk and segmental motion reduction in all three planes is required. Buchalter *et al.*<sup>77</sup> compared moulded polypropylene TLSO with other types of braces, showing that it provides the greatest overall restriction of trunk motion in flexion–extension, lateral bending and axial rotation. This observation has been also confirmed by Lantz and Schultz,<sup>89</sup> who compared a moulded plastic TLSO with lumbosacral corset and chairback brace. According to previous data, the best brace to manage a severe compression vertebral fracture is a custom-moulded TLSO, fitted in hyperextension.

The effect of bracing on the myoelectric activity of trunk muscles has been investigated. Morris and Lucas<sup>90</sup> showed a decrease in myoelectric activity in the abdominal muscles with brace wearing, not associated with an increase in the intra-abdominal pressure. Lantz and Schultz<sup>89</sup> assessed lumbosacral orthoses and a moulded plastic TLSO, describing an increased electrical activity of back muscles when braces are worn. However, a chairback brace was the most effective to reduce muscle electrical activity in anterior weight-holding tasks, whereas a moulded plastic TLSO was more effective in lateral bending tasks. Waters and Morris<sup>91</sup> evaluated myoelectric activity during walking. There was no significant effect of LSO orthoses on abdominal and

back muscles during a low-speed walking. When high-speed walking has been assessed, the back muscle activity was increased. Therefore, the efficacy of lumbar orthoses to reduce myoelectric activity is controversial. Moreover, electric signals are often increased with orthosis wearing.

Only one study evaluated non-operative spinal orthosis for osteoporotic VCF (Fig. 1). Pfeifer *et al.*<sup>74</sup> performed a prospective, randomized, crossover study using a TLO to manage osteoporotic vertebral fractures in women with postmenopausal osteoporosis. Increased trunk muscle strength and subsequent improvement in posture and body height in patients treated with an orthosis was found. Moreover, patients experienced pain reduction with increased quality of life and restoration of ability to perform daily living tasks. The efficacy of conservative spinal orthosis for the management of patients with VCF fractures can be supposed based on the evidences arising from studies on patients with non-osteoporotic vertebral burst fractures.<sup>92–116</sup>

Braces can be an option in patients who tolerate them. However, some patients are unable to wear them. This is particularly relevant in elderly patients with thin skin overlying bony prominences or impaired respiratory function.

## Rehabilitation

After a short period of bed rest, patients should begin early mobilization with rehabilitation exercise programmes. The goals of rehabilitation are prevention of fall and subsequent new fractures, reduction of kyphosis, enhancing axial muscle strength and providing correct spine alignment.

Sinaki *et al.*<sup>117</sup> demonstrated that a spinal extensor strengthening programme and a dynamic proprioceptive programme<sup>118,119</sup> increase bone density and reduce the risk of VCFs. Moreover, the incidence of new fractures associated with back extension exercises is lower than the incidence related to abdominal flexion exercises (16% versus 89%).<sup>120</sup>

Hyperkyphosis is common following osteoporotic vertebral fractures. Severe kyphosis is associated with reduction in the space between the lower ribs and the iliac crest, flank pain and compromise of breathing.<sup>121</sup> Back extensor exercises improve back strength, providing a better dynamic-static posturing and reducing the kyphotic deformity.<sup>122</sup> Correction of kyphosis also results in pain relief, mobility increase and improvement in the patient's quality of life.

Papaioannou *et al.*<sup>123</sup> performed a randomized, controlled trial, showing an improvement in the quality of life over a 6-month period,

following a home exercise programme in patients affected by vertebral fractures. Malmros *et al.*<sup>124</sup> assessed a 10-week exercise programme focusing on balance, strength and lumbar stabilization and confirmed these findings. Bennell *et al.*<sup>125</sup> performed a single-blind randomized controlled pilot trial in which a 10-week multimodal physiotherapy programme was evaluated. This is the first study proposing a multimodal approach, associating manual therapy and exercise. The authors demonstrated the efficacy of the programme in reducing pain and improving physical function and back muscle endurance in patients with a history of painful vertebral fracture. According to previous data, physiotherapy, including several approaches such as manual techniques and exercises, has an important role in individuals affected by osteoporotic vertebral fractures because it provides pain relief and improvement in physical function.<sup>125</sup>

## Conclusions

Current knowledge regarding the best conservative management for patients with osteoporotic VCF is inconclusive.<sup>126</sup> Clearly, studies of higher levels of evidence should be conducted to help answer these questions. Until the best conservative management for patients with VCF is defined and standardized, no conclusions on the superiority of vertebral augmentation techniques over conservative management can be drawn.

## References

- 1 Marwick C. Consensus panel considers osteoporosis. *JAMA* 2000;283:2093–5.
- 2 O'Neill TW, Felsenberg D, Varlow J *et al.* The prevalence of vertebral deformity in European men and women: the European Vertebral Osteoporosis Study. *J Bone Miner Res* 1996;11:1010–8.
- 3 Rao RD, Singrakhia MD. Painful osteoporotic vertebral fracture. Pathogenesis, evaluation, and roles of vertebroplasty and kyphoplasty in its management. *J Bone Joint Surg Am* 2003;85-A:2010–22.
- 4 Tederko P, Kiwerski J, Barcinska-Wierzejska I. Complex management of osteoporotic vertebral fracture. *Ortop Traumatol Rehabil* 2002;4:157–63.
- 5 Leech JA, Dulberg C, Kellie S *et al.* Relationship of lung function to severity of osteoporosis in women. *Am Rev Respir Dis* 1990;141:68–71.
- 6 Papaioannou A, Adachi JD, Parkinson W *et al.* Lengthy hospitalization associated with vertebral fractures despite control for comorbid conditions. *Osteoporos Int* 2001;12:870–4.
- 7 Papaioannou A, Watts NB, Kendler DL *et al.* Diagnosis and management of vertebral fractures in elderly adults. *Am J Med* 2002;113:220–8.
- 8 Prather H, Hunt D, Watson JO *et al.* Conservative care for patients with osteoporotic vertebral compression fractures. *Phys Med Rehabil Clin N Am* 2007;18:577–91, xi.
- 9 Dolan P, Torgerson DJ. The cost of treating osteoporotic fractures in the United Kingdom female population. *Osteoporos Int* 1998;8:611–7.



- 10 Longo UG, Denaro V. Spinal augmentation: what have we learnt? *Lancet* 2009;373:1947–55; author reply 1947–8.
- 11 Denaro L, Longo UG, Denaro V. Vertebroplasty and kyphoplasty: reasons for concern? *Orthop Clin North Am* 2009;40:465–71, viii.
- 12 Galibert P, Deramond H, Rosat P *et al.* Preliminary note on the treatment of vertebral angioma by percutaneous acrylic vertebroplasty. *Neurochirurgie* 1987;33:166–8.
- 13 Garfin SR, Yuan HA, Reiley MA. New technologies in spine: kyphoplasty and vertebroplasty for the treatment of painful osteoporotic compression fractures. *Spine* 2001;26:1511–5.
- 14 Longo UG, Denaro L, Campi S *et al.* Upper cervical spine injuries: indications and limits of the conservative management in Halo vest. A systematic review of efficacy and safety. *Injury* 2010;41:1127–35.
- 15 Denaro V, Longo UG, Denaro L. Vertebroplasty versus conservative treatment for vertebral fractures. *Lancet* 2010;376:2071; author reply 2071–2.
- 16 Farrokhi MR, Alibai E, Maghami Z. Randomized controlled trial of percutaneous vertebroplasty versus optimal medical management for the relief of pain and disability in acute osteoporotic vertebral compression fractures. *J Neurosurg Spine* 2011;14:561–9.
- 17 Ames PR, Longo UG, Denaro V *et al.* Achilles tendon problems: not just an orthopaedic issue. *Disabil Rehabil* 2008;30:1646–50.
- 18 Amlang MH, Maffulli N, Longo UG *et al.* Surgical treatment of Achilles tendon rupture. *Unfallchirurg* 2010;113:712–20.
- 19 De Mozzi P, Longo UG, Galanti G *et al.* Bicuspid aortic valve: a literature review and its impact on sport activity. *Br Med Bull* 2008;85:63–85.
- 20 Khanna A, Gougoulias N, Longo UG *et al.* Minimally invasive total knee arthroplasty: a systematic review. *Orthop Clin North Am* 2009;40:479–89, viii.
- 21 Khanna A, Friel M, Gougoulias N *et al.* Prevention of adhesions in surgery of the flexor tendons of the hand: what is the evidence? *Br Med Bull* 2009;90:85–109.
- 22 Lippi G, Longo UG, Maffulli N. Genetics and sports. *Br Med Bull* 2010;93:27–47.
- 23 Longo UG, King JB, Denaro V *et al.* Double-bundle arthroscopic reconstruction of the anterior cruciate ligament: does the evidence add up? *J Bone Joint Surg Br* 2008;90:995–9.
- 24 Longo UG, Ramamurthy C, Denaro V *et al.* Minimally invasive stripping for chronic Achilles tendinopathy. *Disabil Rehabil* 2008;30:1709–13.
- 25 Longo UG, Oliva F, Olivia F *et al.* Oxygen species and overuse tendinopathy in athletes. *Disabil Rehabil* 2008;30:1563–71.
- 26 Longo UG, Franceschi F, Loppini M *et al.* Rating systems for evaluation of the elbow. *Br Med Bull* 2008;87:131–61.
- 27 Longo UG, Ronga M, Maffulli N. Achilles tendinopathy. *Sports Med Arthrosc* 2009;17:112–26.
- 28 Longo UG, Ronga M, Maffulli N. Acute ruptures of the achilles tendon. *Sports Med Arthrosc* 2009;17:127–38.
- 29 Longo UG, Papapietro N, Maffulli N *et al.* Thoracoscopy for minimally invasive thoracic spine surgery. *Orthop Clin North Am* 2009;40:459–64, vii.
- 30 Longo UG, Franceschetti E, Maffulli N *et al.* Hip arthroscopy: state of the art. *Br Med Bull* 2010;96:131–57.
- 31 Longo UG, Loppini M, Denaro L *et al.* Rating scales for low back pain. *Br Med Bull* 2010;94:81–144.
- 32 Longo UG, Lamberti A, Maffulli N *et al.* Tendon augmentation grafts: a systematic review. *Br Med Bull* 2010;94:165–88.
- 33 Longo UG, Forriol F, Campi S *et al.* Animal models for translational research on shoulder pathologies: from bench to bedside. *Sports Med Arthrosc* 2011;19:184–93.
- 34 Longo UG, Buchmann S, Berton A *et al.* Arthroscopic knots and strength sutures for rotator cuff repair. *Sports Med Arthrosc* 2011;19:251–65.
- 35 Longo UG, Berton A, Ahrens PM *et al.* Clinical tests for the diagnosis of rotator cuff disease. *Sports Med Arthrosc* 2011;19:266–78.
- 36 Longo UG, Lamberti A, Maffulli N *et al.* Tissue engineered biological augmentation for tendon healing: a systematic review. *Br Med Bull* 2011;98:31–59.



- 37 Maffulli N, Longo UG, Oliva F *et al.* Minimally invasive surgery of the achilles tendon. *Orthop Clin North Am* 2009;40:491–8, viii–ix.
- 38 Maffulli N, Longo UG, Gougoulias N *et al.* Long-term health outcomes of youth sports injuries. *Br J Sports Med* 2010;44:21–5.
- 39 Maffulli N, Longo UG, Denaro V. Novel approaches for the management of tendinopathy. *J Bone Joint Surg Am* 2010;92:2604–13.
- 40 Maffulli N, Longo UG, Spiezia F *et al.* Sports injuries in young athletes: long-term outcome and prevention strategies. *Phys Sportsmed* 2010;38:29–34.
- 41 Maffulli N, Longo UG, Spiezia F *et al.* Aetiology and prevention of injuries in elite young athletes. *Med Sport Sci* 2011;56:187–200.
- 42 Maffulli N, Longo UG, Marinozzi A *et al.* Hallux valgus: effectiveness and safety of minimally invasive surgery. A systematic review. *Br Med Bull* 2011;97:149–67.
- 43 Maffulli N, Longo UG, Gougoulias N *et al.* Sport injuries: a review of outcomes. *Br Med Bull* 2011;97:47–80.
- 44 Kanis JA, Melton LJ III, Christiansen C *et al.* The diagnosis of osteoporosis. *J Bone Miner Res* 1994;9:1137–41.
- 45 Kanis JA. Assessment of fracture risk and its application to screening for postmenopausal osteoporosis: synopsis of a WHO report. WHO Study Group. *Osteoporos Int* 1994;4:368–81.
- 46 Kanis JA, Oden A, Johnell O *et al.* The burden of osteoporotic fractures: a method for setting intervention thresholds. *Osteoporos Int* 2001;12:417–27.
- 47 Marshall D, Johnell O, Wedel H. Meta-analysis of how well measures of bone mineral density predict occurrence of osteoporotic fractures. *BMJ* 1996;312:1254–9.
- 48 Kanis JA, Johnell O, Oden A *et al.* Ten year probabilities of osteoporotic fractures according to BMD and diagnostic thresholds. *Osteoporos Int* 2001;12:989–95.
- 49 Lane JM, Nydick M. Osteoporosis: current modes of prevention and treatment. *J Am Acad Orthop Surg* 1999;7:19–31.
- 50 Ross PD, Davis JW, Epstein RS *et al.* Pre-existing fractures and bone mass predict vertebral fracture incidence in women. *Ann Intern Med* 1991;114:919–23.
- 51 Eastell R, Cedel SL, Wahner HW *et al.* Classification of vertebral fractures. *J Bone Miner Res* 1991;6:207–15.
- 52 Sugita M, Watanabe N, Mikami Y *et al.* Classification of vertebral compression fractures in the osteoporotic spine. *J Spinal Disord Tech* 2005;18:376–81.
- 53 Wu CT, Lee SC, Lee ST *et al.* Classification of symptomatic osteoporotic compression fractures of the thoracic and lumbar spine. *J Clin Neurosci* 2006;13:31–8.
- 54 Prather H, Watson JO, Gilula LA. Nonoperative management of osteoporotic vertebral compression fractures. *Injury* 2007;38(Suppl. 3):S40–8.
- 55 Lane JM, Riley EH, Wirganowicz PZ. Osteoporosis: diagnosis and treatment. *Instr Course Lect* 1997;46:445–58.
- 56 Boden SD, Wiesel SW. Lumbosacral segmental motion in normal individuals. Have we been measuring instability properly? *Spine (Phila Pa 1976)* 1990;15:571–6.
- 57 Malghem J, Maldague B, Labaisse MA *et al.* Intravertebral vacuum cleft: changes in content after supine positioning. *Radiology* 1993;187:483–7.
- 58 Rupp RE, Ebraheim NA, Coombs RJ. Magnetic resonance imaging differentiation of compression spine fractures or vertebral lesions caused by osteoporosis or tumor. *Spine (Phila Pa 1976)* 1995;20:2499–503; discussion 2504.
- 59 Schmitz A, Risse JH, Textor J *et al.* FDG-PET findings of vertebral compression fractures in osteoporosis: preliminary results. *Osteoporos Int* 2002;13:755–61.
- 60 Silverman SL. The clinical consequences of vertebral compression fracture. *Bone* 1992;13(Suppl. 2):S27–31.
- 61 Lyles KW. Management of patients with vertebral compression fractures. *Pharmacotherapy* 1999;19:215–245.
- 62 Bombardier C, Laine L, Reicin A *et al.* Comparison of upper gastrointestinal toxicity of rofecoxib and naproxen in patients with rheumatoid arthritis. VIGOR Study Group. *N Engl J Med* 2000;343:1520–8, 2 p following 1528.

- 63 Dodwell ER, Latorre JG, Parisini E *et al.* NSAID exposure and risk of nonunion: a meta-analysis of case-control and cohort studies. *Calcif Tissue Int* 2010;**87**:193–202, 2 p following 1528.
- 64 Cherasse A, Muller G, Ornetti P *et al.* Tolerability of opioids in patients with acute pain due to nonmalignant musculoskeletal disease. A hospital-based observational study. *Joint Bone Spine* 2004;**71**:572–6.
- 65 Browning R, Jackson JL, O'Malley PG. Cyclobenzaprine and back pain: a meta-analysis. *Arch Intern Med* 2001;**161**:1613–20.
- 66 van Tulder MW, Touray T, Furlan AD *et al.* Muscle relaxants for non-specific low back pain. *Cochrane Database Syst Rev* 2003;CD004252.
- 67 Knopp JA, Diner BM, Blitz M *et al.* Calcitonin for treating acute pain of osteoporotic vertebral compression fractures: a systematic review of randomized, controlled trials. *Osteoporos Int* 2005;**16**:1281–90.
- 68 Rovetta G, Monteforte P, Balestra V. Intravenous clodronate for acute pain induced by osteoporotic vertebral fracture. *Drugs Exp Clin Res* 2000;**26**:25–30.
- 69 Rovetta G, Maggiani G, Molfetta L *et al.* One-month follow-up of patients treated by intravenous clodronate for acute pain induced by osteoporotic vertebral fracture. *Drugs Exp Clin Res* 2001;**27**:77–81.
- 70 Armingeat T, Brondino R, Pham T *et al.* Intravenous pamidronate for pain relief in recent osteoporotic vertebral compression fracture: a randomized double-blind controlled study. *Osteoporos Int* 2006;**17**:1659–65.
- 71 Nevitt MC, Chen P, Dore RK *et al.* Reduced risk of back pain following teriparatide treatment: a meta-analysis. *Osteoporos Int* 2006;**17**:273–80.
- 72 Nevitt MC, Chen P, Kiel DP *et al.* Reduction in the risk of developing back pain persists at least 30 months after discontinuation of teriparatide treatment: a meta-analysis. *Osteoporos Int* 2006;**17**:1630–7.
- 73 Kim DH, Vaccaro AR. Osteoporotic compression fractures of the spine; current options and considerations for treatment. *Spine J* 2006;**6**:479–87.
- 74 Pfeifer M, Begerow B, Minne HW. Effects of a new spinal orthosis on posture, trunk strength, and quality of life in women with postmenopausal osteoporosis: a randomized trial. *Am J Phys Med Rehabil* 2004;**83**:177–86.
- 75 Stillo JV, Stein AB, Ragnarsson KT. Low-back orthoses. *Phys Med Rehabil Clin N Am* 1992;**3**:57–91.
- 76 Lukert BP. Vertebral compression fractures: how to manage pain, avoid disability. *Geriatrics* 1994;**49**:22–6.
- 77 Buchalter D, Kahanovitz N, Viola K *et al.* Three-dimensional spinal motion measurements. Part 2: A noninvasive assessment of lumbar brace immobilization of the spine. *J Spinal Disord* 1988;**1**:284–6.
- 78 Buchalter D, Parnianpour M, Viola K *et al.* Three-dimensional spinal motion measurements. Part 1: A technique for examining posture and functional spinal motion. *J Spinal Disord* 1988;**1**:279–83.
- 79 Fidler MW, Plasmans CM. The effect of four types of support on the segmental mobility of the lumbosacral spine. *J Bone Joint Surg Am* 1983;**65**:943–7.
- 80 Axelsson P, Johnsson R, Stromqvist B. Effect of lumbar orthosis on intervertebral mobility. A roentgen stereophotogrammetric analysis. *Spine (Phila Pa 1976)* 1992;**17**:678–81.
- 81 Krag MH, Fox MJ, Haugh LD. Comparison of three lumbar orthoses using motion assessment during task performance. *Spine (Phila Pa 1976)* 2003;**28**:2359–67.
- 82 Brown T, Norton PL. The immobilizing efficiency of back braces; their effect on the posture and motion of the lumbosacral spine. *J Bone Joint Surg Am* 1957;**39-A**:111–39; passim.
- 83 Tuong NH, Dansereau J, Maurais G *et al.* Three-dimensional evaluation of lumbar orthosis effects on spinal behavior. *J Rehabil Res Dev* 1998;**35**:34–42.
- 84 Lumsden RM II, Morris JM. An in vivo study of axial rotation and immobilization at the lumbosacral joint. *J Bone Joint Surg Am* 1968;**50**:1591–602.
- 85 Cholewicki J, Lee AS, Peter Reeves N *et al.* Comparison of trunk stiffness provided by different design characteristics of lumbosacral orthoses. *Clin Biomech (Bristol, Avon)* 2010;**25**:110–4.

- 86 Jewett RS, Jewett EL. Hyperextension back brace for orthopedic, geriatrics and adolescent osseous conditions. *J Int Coll Surg* 1952;18:555–60.
- 87 Patwardhan AG, Li SP, Gavin T et al. Orthotic stabilization of thoracolumbar injuries. A biomechanical analysis of the Jewett hyperextension orthosis. *Spine (Phila Pa 1976)* 1990;15:654–61.
- 88 Liaw MY, Chen CL, Chen JF et al. Effects of Knight-Taylor brace on balance performance in osteoporotic patients with vertebral compression fracture. *J Back Musculoskelet Rehabil* 2009;22:75–81.
- 89 Lantz SA, Schultz AB. Lumbar spine orthosis wearing. II. Effect on trunk muscle myoelectric activity. *Spine (Phila Pa 1976)* 1986;11:838–42.
- 90 Morris JM, Lucas DB. Physiological considerations in bracing of the spine. *Orthop Prosth Appl* 1963;37:44.
- 91 Waters RL, Morris JM. Effect of spinal supports on the electrical activity of muscles of the trunk. *J Bone Joint Surg Am* 1970;52:51–60.
- 92 Denis F, Armstrong GW, Searls K et al. Acute thoracolumbar burst fractures in the absence of neurologic deficit. A comparison between operative and nonoperative treatment. *Clin Orthop Relat Res* 1984;189:142–9.
- 93 Dai LY, Jiang LS, Jiang SD. Conservative treatment of thoracolumbar burst fractures: a long-term follow-up results with special reference to the load sharing classification. *Spine (Phila Pa 1976)* 2008;33:2536–44.
- 94 Cantor JB, Lebowhl NH, Garvey T et al. Nonoperative management of stable thoracolumbar burst fractures with early ambulation and bracing. *Spine (Phila Pa 1976)* 1993;18:971–6.
- 95 Chan DP, Seng NK, Kaan KT. Nonoperative treatment in burst fractures of the lumbar spine (L2-L5) without neurologic deficits. *Spine (Phila Pa 1976)* 1993;18:320–5.
- 96 Alanay A, Yazici M, Acaroglu E et al. Course of nonsurgical management of burst fractures with intact posterior ligamentous complex: an MRI study. *Spine (Phila Pa 1976)* 2004;29:2425–31.
- 97 Bailey CS, Dvorak MF, Thomas KC et al. Comparison of thoracolumbosacral orthosis and no orthosis for the treatment of thoracolumbar burst fractures: interim analysis of a multicenter randomized clinical equivalence trial. *J Neurosurg Spine* 2009;11:295–303.
- 98 Ohana N, Sheinis D, Rath E et al. Is there a need for lumbar orthosis in mild compression fractures of the thoracolumbar spine?: A retrospective study comparing the radiographic results between early ambulation with and without lumbar orthosis. *J Spinal Disord* 2000;13:305–8.
- 99 Post RB, Keizer HJ, Leferink VJ et al. Functional outcome 5 years after non-operative treatment of type A spinal fractures. *Eur Spine J* 2006;15:472–8.
- 100 Knight RQ, Stornelli DP, Chan DP et al. Comparison of operative versus nonoperative treatment of lumbar burst fractures. *Clin Orthop Relat Res* 1993;293:112–21.
- 101 Davies WE, Morris JH, Hill V. An analysis of conservative (non-surgical) management of thoracolumbar fractures and fracture-dislocations with neural damage. *J Bone Joint Surg Am* 1980;62:1324–8.
- 102 Chow GH, Nelson BJ, Gebhard JS et al. Functional outcome of thoracolumbar burst fractures managed with hyperextension casting or bracing and early mobilization. *Spine (Phila Pa 1976)* 1996;21:2170–5.
- 103 Giele BM, Wiertsema SH, Beelen A et al. No evidence for the effectiveness of bracing in patients with thoracolumbar fractures. *Acta Orthop* 2009;80:226–32.
- 104 Tropiano P, Huang RC, Louis CA et al. Functional and radiographic outcome of thoracolumbar and lumbar burst fractures managed by closed orthopaedic reduction and casting. *Spine (Phila Pa 1976)* 2003;28:2459–65.
- 105 Agus H, Kayali C, Arslantas M. Nonoperative treatment of burst-type thoracolumbar vertebra fractures: clinical and radiological results of 29 patients. *Eur Spine J* 2005;14:536–40.
- 106 Stadhouders A, Buskens E, Vergoesen DA et al. Nonoperative treatment of thoracic and lumbar spine fractures: a prospective randomized study of different treatment options. *J Orthop Trauma* 2009;23:588–94.
- 107 Tonbul M, Yilmaz MR, Ozbaydar MU et al. Long-term results of conservative treatment for thoracolumbar compression fractures. *Acta Orthop Traumatol Turc* 2008;42:80–3.

- 108 Reid DC, Hu R, Davis LA *et al.* The nonoperative treatment of burst fractures of the thoracolumbar junction. *J Trauma* 1988;**28**:1188–94.
- 109 Weinstein JN, Collalto P, Lehmann TR. Thoracolumbar ‘burst’ fractures treated conservatively: a long-term follow-up. *Spine (Phila Pa 1976)* 1988;**13**:33–8.
- 110 Weninger P, Schultz A, Hertz H. Conservative management of thoracolumbar and lumbar spine compression and burst fractures: functional and radiographic outcomes in 136 cases treated by closed reduction and casting. *Arch Orthop Trauma Surg* 2009;**129**:207–19.
- 111 Shen WJ, Shen YS. Nonsurgical treatment of three-column thoracolumbar junction burst fractures without neurologic deficit. *Spine (Phila Pa 1976)* 1999;**24**:412–5.
- 112 Wood K, Buttermann G, Mehbod A *et al.* Operative compared with nonoperative treatment of a thoracolumbar burst fracture without neurological deficit. A prospective, randomized study. *J Bone Joint Surg Am* 2003;**85**:773–81.
- 113 Folman Y, Gepstein R. Late outcome of nonoperative management of thoracolumbar vertebral wedge fractures. *J Orthop Trauma* 2003;**17**:190–2.
- 114 Krompinger WJ, Fredrickson BE, Mino DE *et al.* Conservative treatment of fractures of the thoracic and lumbar spine. *Orthop Clin North Am* 1986;**17**:161–70.
- 115 Moller A, Hasselius R, Redlund-Johnell I *et al.* Nonoperatively treated burst fractures of the thoracic and lumbar spine in adults: a 23- to 41-year follow-up. *Spine J* 2007;**7**:701–7.
- 116 Mumford J, Weinstein JN, Spratt KF *et al.* Thoracolumbar burst fractures. The clinical efficacy and outcome of nonoperative management. *Spine (Phila Pa 1976)* 1993;**18**:955–70.
- 117 Sinaki M, Itoi E, Wahner HW *et al.* Stronger back muscles reduce the incidence of vertebral fractures: a prospective 10 year follow-up of postmenopausal women. *Bone* 2002;**30**:836–41.
- 118 Sinaki M, Lynn SG. Reducing the risk of falls through proprioceptive dynamic posture training in osteoporotic women with kyphotic posturing: a randomized pilot study. *Am J Phys Med Rehabil* 2002;**81**:241–6.
- 119 Sinaki M, Brey RH, Hughes CA *et al.* Significant reduction in risk of falls and back pain in osteoporotic-kyphotic women through a Spinal Proprioceptive Extension Exercise Dynamic (SPEED) program. *Mayo Clin Proc* 2005;**80**:849–55.
- 120 Sinaki M, Mikkelsen BA. Postmenopausal spinal osteoporosis: flexion versus extension exercises. *Arch Phys Med Rehabil* 1984;**65**:593–6.
- 121 Schlaich C, Minne HW, Bruckner T *et al.* Reduced pulmonary function in patients with spinal osteoporotic fractures. *Osteoporos Int* 1998;**8**:261–7.
- 122 Itoi E, Sinaki M. Effect of back-strengthening exercise on posture in healthy women 49 to 65 years of age. *Mayo Clin Proc* 1994;**69**:1054–9.
- 123 Papaioannou A, Adachi JD, Winegard K *et al.* Efficacy of home-based exercise for improving quality of life among elderly women with symptomatic osteoporosis-related vertebral fractures. *Osteoporos Int* 2003;**14**:677–82.
- 124 Malmros B, Mortensen L, Jensen MB *et al.* Positive effects of physiotherapy on chronic pain and performance in osteoporosis. *Osteoporos Int* 1998;**8**:215–21.
- 125 Bennell KL, Matthews B, Greig A *et al.* Effects of an exercise and manual therapy program on physical impairments, function and quality-of-life in people with osteoporotic vertebral fracture: a randomised, single-blind controlled pilot trial. *BMC Musculoskelet Disord* 2010;**11**:36.
- 126 Longo UG, Loppini M, Denaro L *et al.* The effectiveness and safety of vertebroplasty for osteoporotic vertebral compression fractures. A double blind, prospective, randomized, controlled study. *Clini Cases Mineral Bone Metab* 2010;**7**:109–113.
